# Supplementary material for: An ultrafast approach for the syntheses of defective nanosized lanthanide perovskites for catalytic toluene oxidation
Source: Royal Society of Chemistry journal article supplement (doi:10.1039/c8cy01000e), 2018-01-01
Supplement: c8cy01000e1.pdf [file c8cy01000e1.pdf]

## Supporting Information

### Ultrafast Approach for the Syntheses of Defective Nanosized Lanthanide Perovskites for Catalytic Toluene Oxidation

Xiaole Weng<sup>a</sup>, Wang Long Wang<sup>a</sup>, Qingjie Meng<sup>a</sup> and Zhongbiao Wu<sup>\*a</sup>

<sup>a</sup> Key Laboratory of Environment Remediation and Ecological Health, Ministry of Education, College of Environmental and Resource Sciences, Zhejiang University, Zhejiang Provincial Engineering Research Center of Industrial Boiler & Furnace Flue Gas Pollution Control, 388 Yuhangtang Road, Hangzhou, 310058, P. R. China.

**Corresponding author:** Dr. Zhongbiao Wu, Fax/Tel: 0086571 8795308; E-mail: [zbwu@zju.edu.cn](mailto:zbwu@zju.edu.cn).

#### 1. Catalyst syntheses

**sc-H<sub>2</sub>O route:** In a typical synthesis (see **Fig. S1**), metal nitrate solution (with or without H<sub>2</sub>O<sub>2</sub>) and NaOH were separately pumped into the reactor by using HPLC pumps at a range of flow rates including 6 and 7.5 mL.min<sup>-1</sup>. The two streams were mixed in a stainless steel Swagelok<sup>TM</sup> 1/8" Tee" piece at room temperature, which was then carried to meet a stream of deionized water that was fed by another HPLC pumps at a certain flow rates (e.g. 25 and 30 mL.min<sup>-1</sup>), heated beyond the supercritical temperature (at 374 °C) by using an electric furnace and then transported through a stainless steel Swagelok<sup>TM</sup> 1/16" tube into a confined jet mixer (i.e. reactor, a Swagelok<sup>TM</sup> 1/4" cross<sup>[1]</sup>). An adjustable length band heater set to 550 °C was added to reactor to maintain the reaction temperature. By altering the band heater length and flow velocity, the residence time can be tuned in a wide range. The precipitates formed in the confined jet mixer were cooled down to room temperature, passed through a 7 μm filter to remove large aggregates and then collected from the exit of

25 back-pressure regulator (that was used to maintain the system pressure at ca. 23.1  
 26 MPa). Solids were collected by centrifuging the slurry (5000 rpm, 5min) and then  
 27 freeze-dried to obtain products as black colored fluffy powder. The advantage of jet  
 28 mixer is that it enable the precursors to encounter with a high-speed jet of  
 29 supercritical water, thus leading to a rapid and momentum-driven mixing for hybrid  
 30 oxides. Another advantage is that such mixing route will maintain a high temperature  
 31 for the reactor.

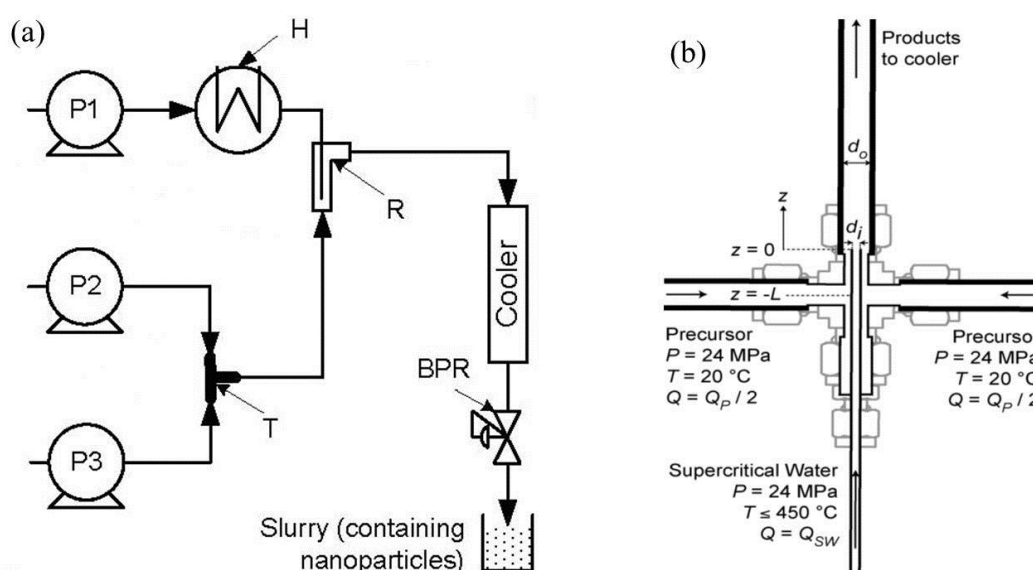

33 **Fig. S1** (a) Schematic representation of the three-pump (P1–P3) continuous hydrothermal flow  
 34 synthesis system that was used to prepare nanoparticles catalysts. Key: P = pump, BPR = back-  
 35 pressure regulator, R = reactor, H = heater, T = T junction; (b) Schematic diagram of the confined  
 36 jet reactor [Gruar, R. I.; Tighe, C. J.; Darr, J. A. *Industrial & Engineering Chemistry Research*  
 37 2013, 52 (15), 5270-5281].

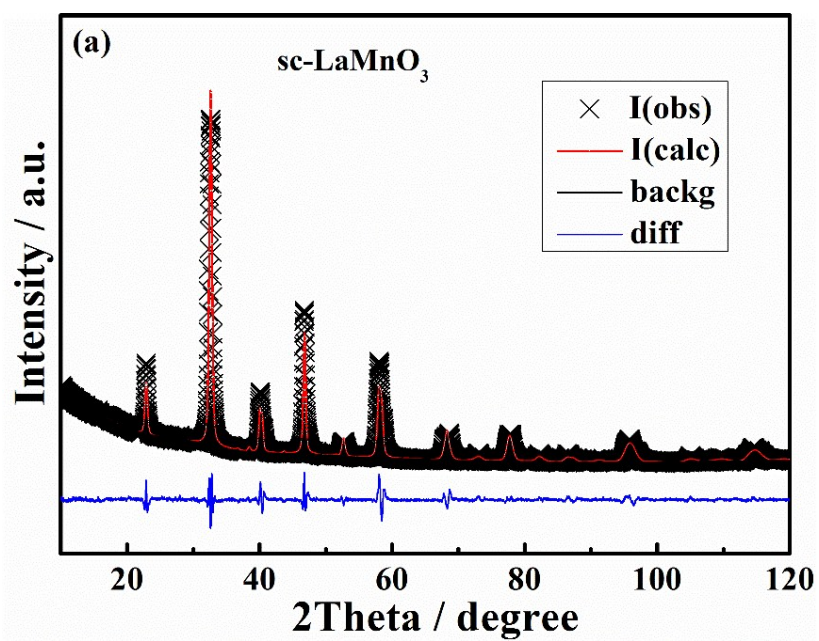

40

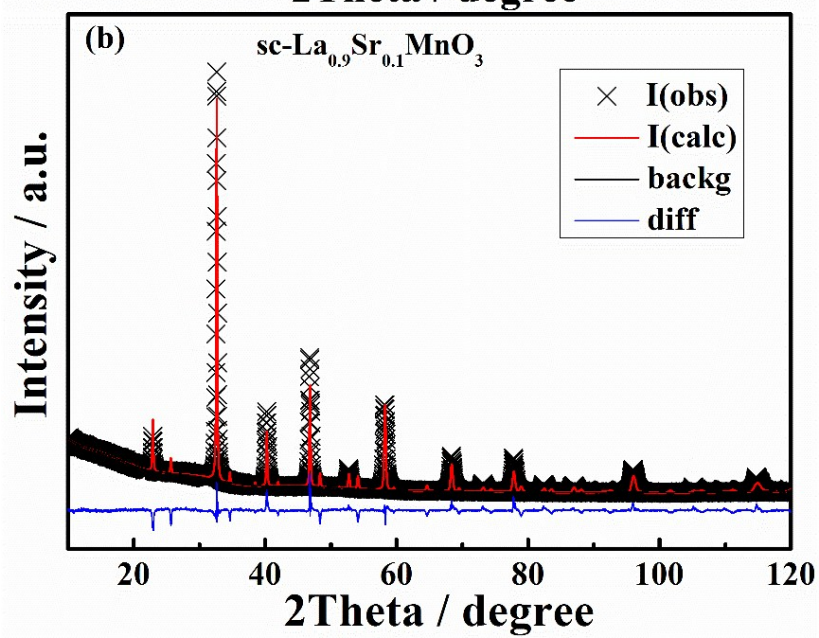

41

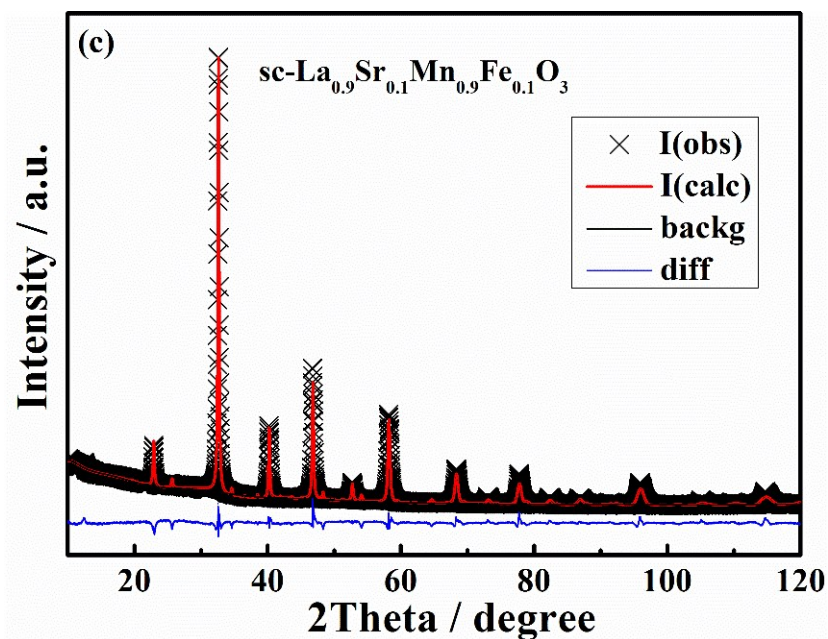

42

43 **Fig. S2** Rietveld refinement data of (a)  $\text{sc-LaMnO}_3$ , (b)  $\text{sc-La}_{0.9}\text{Sr}_{0.1}\text{MnO}_3$  and (c)  $\text{sc-La}_{0.9}\text{Sr}_{0.1}\text{Mn}_{0.9}\text{Fe}_{0.1}\text{O}_3$  catalysts.

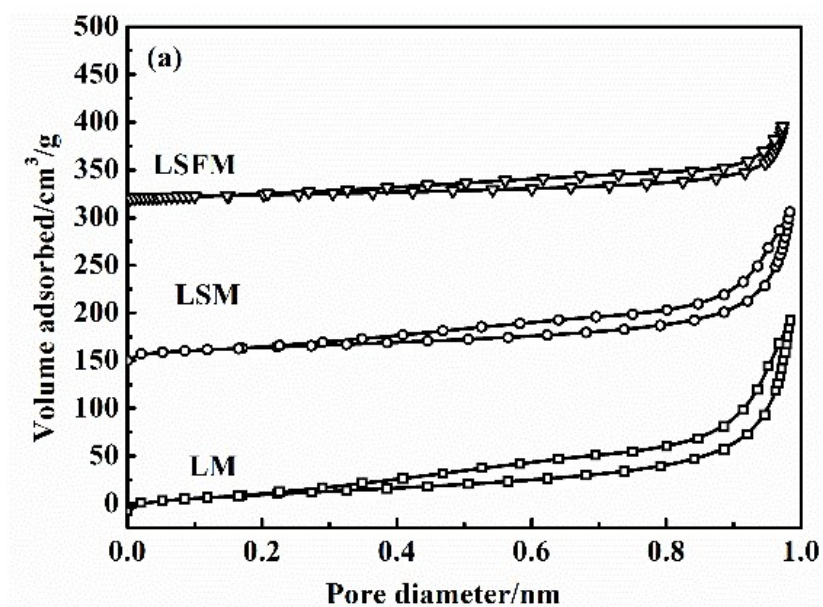

45

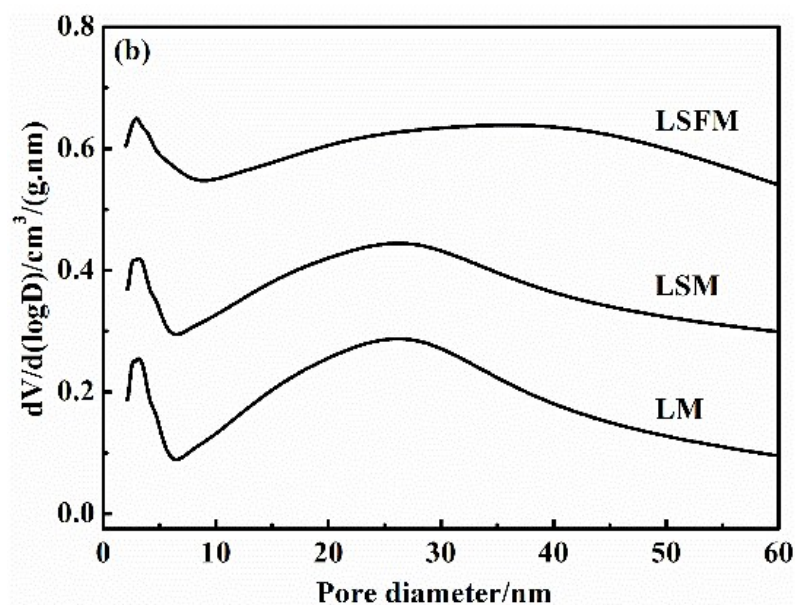

46

47 **Fig. S3** (a) Nitrogen adsorption–desorption isotherms and (b) pore-size distributions of  
 48  $\text{LaMnO}_3$ ,  $\text{sc-La}_{0.9}\text{Sr}_{0.1}\text{MnO}_3$  and  $\text{sc-La}_{0.9}\text{Sr}_{0.1}\text{Mn}_{0.9}\text{Fe}_{0.1}\text{O}_3$  catalysts.

49 **Table. S1** BET surface areas, pore volume, average pore size of each catalyst.

| catalyst                                                                    | Surface area<br>/ $\text{m}^2/\text{g}$ | Pore volume<br>/ $\text{cm}^3/\text{g}$ | Average pore<br>size / nm |
|-----------------------------------------------------------------------------|-----------------------------------------|-----------------------------------------|---------------------------|
| $\text{sc-LaMnO}_3$                                                         | 67.86                                   | 0.327                                   | 11.58                     |
| $\text{sc-La}_{0.9}\text{Sr}_{0.1}\text{MnO}_3$                             | 52.69                                   | 0.254                                   | 13.83                     |
| $\text{sc-La}_{0.9}\text{Sr}_{0.1}\text{Mn}_{0.9}\text{Fe}_{0.1}\text{O}_3$ | 28.46                                   | 0.123                                   | 17.22                     |

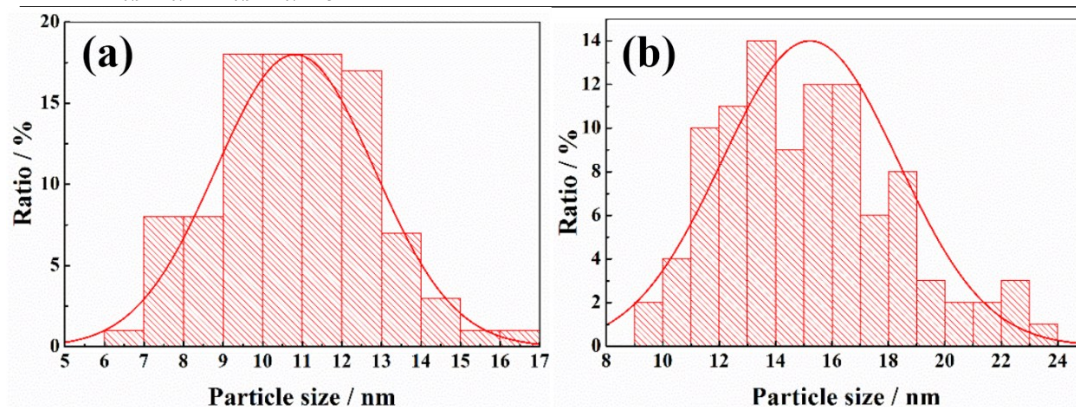

50

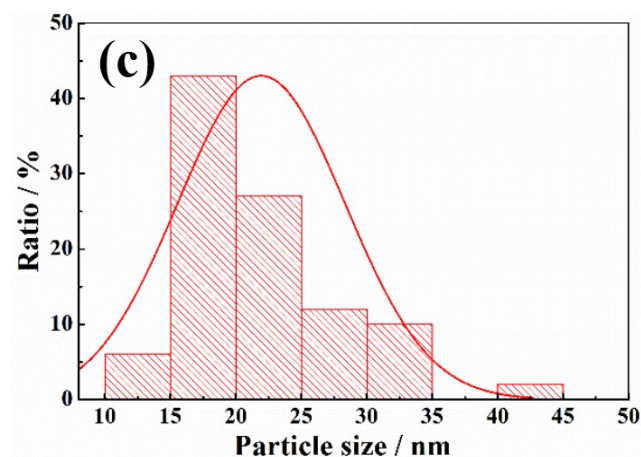

51

52 **Fig. S4** Particle size distribution of (a) sc-LaMnO<sub>3</sub>, (b) sc-La<sub>0.9</sub>Sr<sub>0.1</sub>MnO<sub>3</sub> and (c) sc-  
53 La<sub>0.9</sub>Sr<sub>0.1</sub>Mn<sub>0.9</sub>Fe<sub>0.1</sub>O<sub>3</sub> catalysts.

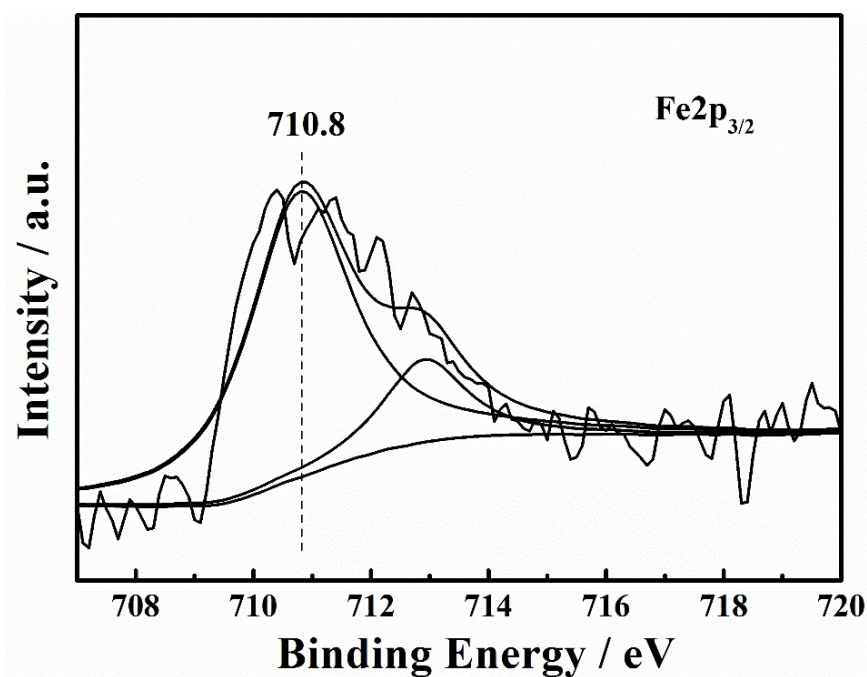

54

55 **Fig. S5** Fe2p<sub>3/2</sub> spectra of sc-La<sub>0.9</sub>Sr<sub>0.1</sub>Mn<sub>0.9</sub>Fe<sub>0.1</sub>O<sub>3</sub> catalyst.

56 **Table. S2** Summary of literature data on catalytic oxidation of toluene over the noble metal  
57 catalysts under a similar condition.

| catalysts                  | Toluene concentration /<br>ppm | GHSV /<br>h <sup>-1</sup> or mL.g <sup>-1</sup> .h <sup>-1</sup> | T <sub>90</sub> / | Ref |
|----------------------------|--------------------------------|------------------------------------------------------------------|-------------------|-----|
| 0.5 wt.% Pd/C              | 1000                           | 30000                                                            | 361               | [2] |
| 1 wt.% Pt/CeO <sub>2</sub> | 1000                           | 40000                                                            | 225               | [3] |

|                                            |      |       |     |     |
|--------------------------------------------|------|-------|-----|-----|
| 1 wt.% Pt/Al <sub>2</sub> O <sub>3</sub>   | 600  | 60000 | 235 | [4] |
| 0.71wt.% Au/Fe <sub>2</sub> O <sub>3</sub> | 1000 | 20000 | 250 | [5] |

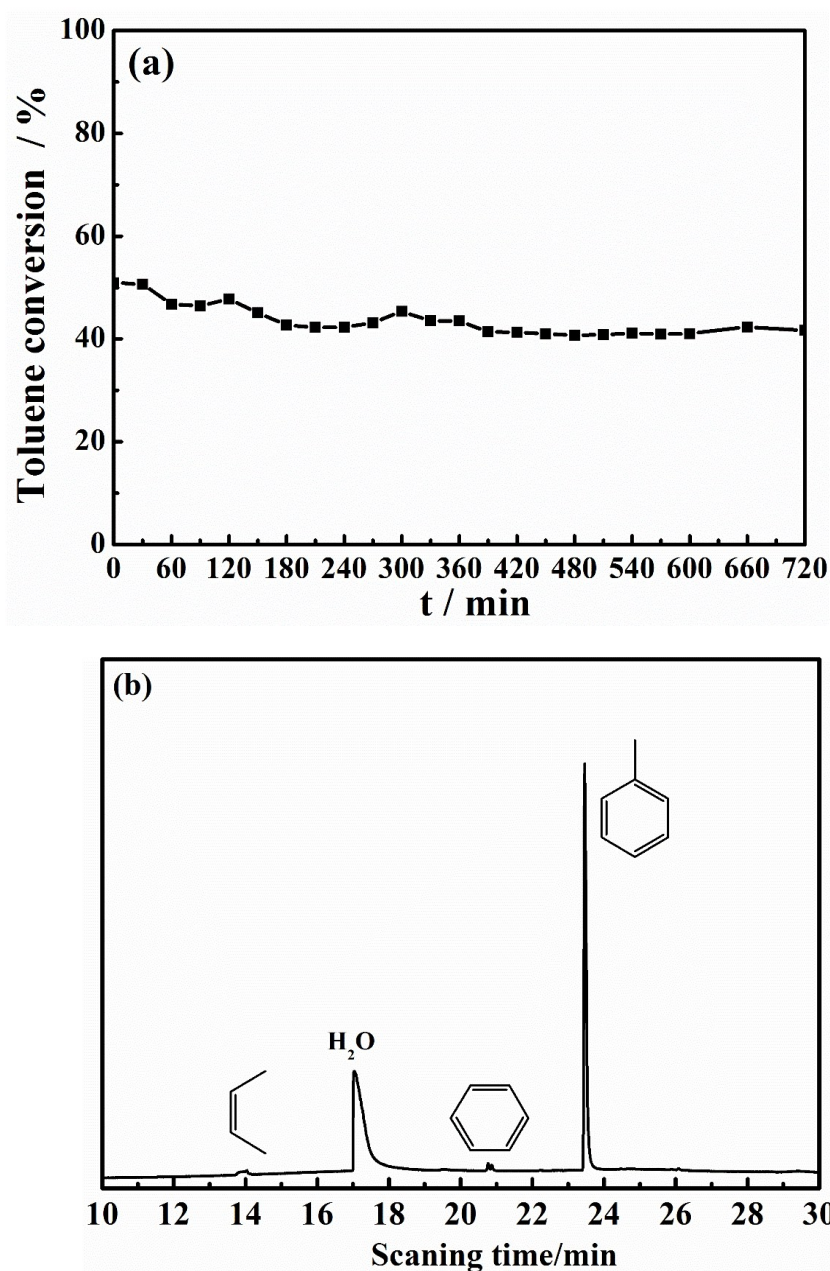

**Fig. S6 (a)** the time dependence curves of toluene conversion over sc-La<sub>0.9</sub>Sr<sub>0.1</sub>Mn<sub>0.9</sub>Fe<sub>0.1</sub>O<sub>3</sub> catalyst and **(b)** GC-MS analyses of the sc-La<sub>0.9</sub>Sr<sub>0.1</sub>Mn<sub>0.9</sub>Fe<sub>0.1</sub>O<sub>3</sub> after stability test.

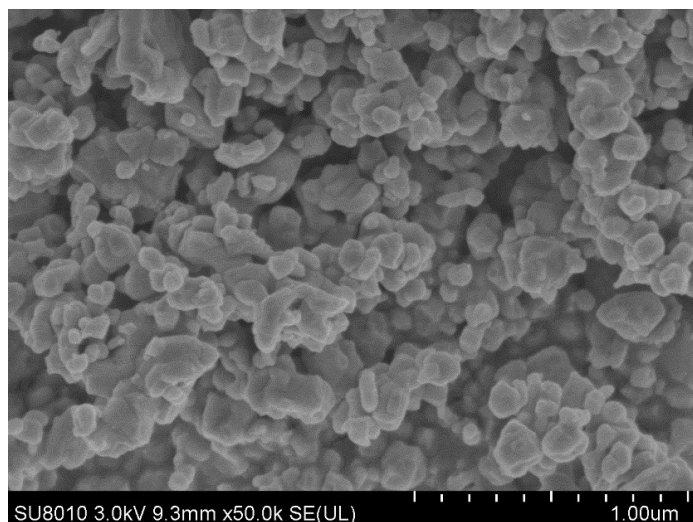

**Fig. S7** SEM image of cr-LaMnO<sub>3</sub> sample.

## Reference

1. R. I. Gruar, C. J. Tighe and J. A. Darr, *Ind. Eng. Chem. Res.*, 2013, **52**, 5270-5281.
2. S. Morales-Torres, F. J. Maldonado-Hódar, A. F. Pérez-Cadenas and F. Carrasco-Marín, *J. Hazard. Mater.*, 2010, **183**, 814-822.
3. Z. Abdelouahab-Reddam, R. E. Mail, F. Coloma and A. Sepúlveda-Escribano, *Appl. Catal., A*, 2015, **494**, 87-94.
4. A. M. Carrillo and J. G. Carriazo, *Appl. Catal., B*, 2015, **164**, 443-452.
5. W. Han, J. Deng, S. Xie, H. Yang, H. Dai and C. T. Au, *Ind. Eng. Chem. Res.*, 2014, **53**, 3486-3494.
